# Supplementary material for: A rapid discriminative hydrogen–deuterium exchange and LC-HRMS/MS strategy for primary and higher order structural mapping of therapeutic proteins: a case study using filgrastim
Source: Royal Society of Chemistry journal article supplement (doi:10.1039/d2ay01788a), 2023-01-01

## Supplementary files

### S-1: Optimized method for Intact Mass Analysis

|                   |                        |                                                                                                                                                          |
|-------------------|------------------------|----------------------------------------------------------------------------------------------------------------------------------------------------------|
| Source Parameters | VCap                   | 3800                                                                                                                                                     |
|                   | Ion Source Type        | H-ESI                                                                                                                                                    |
|                   | Sheath Gas             | 40                                                                                                                                                       |
|                   | Aux Gas                | 10                                                                                                                                                       |
|                   | Sweep Gas              | 2                                                                                                                                                        |
|                   | Ion Transfer Tube Temp | 320°C                                                                                                                                                    |
|                   | Vaporizer Temp         | 310°C                                                                                                                                                    |
|                   | Default Charge State   | 6                                                                                                                                                        |
| Method Parameters | Diverter Setting       | 0-1.5- Waste; 1.5-5.8-MS; 5.8-6.0-Waste                                                                                                                  |
|                   | Acquisition Range      | 500-4000m/z                                                                                                                                              |
|                   | Orbitrap Resolution    | 120000                                                                                                                                                   |
| LC-Parameters     | AGC Target             | 4X10 <sup>5</sup>                                                                                                                                        |
|                   | Column                 | BioZen XB C18 (150 X 4.6mm, 2.6µm)                                                                                                                       |
|                   | Mobile Phase           | (A) Water: 0.1%(%v/v) Formic acid, (B) ACN: 0.1%(%v/v) Formic acid                                                                                       |
|                   | Flow Rate              | 400µl/min                                                                                                                                                |
|                   | Injection Volume       | 5µL                                                                                                                                                      |
| LC-Parameters     | Gradient Program       | Tmin/A:B- T <sub>0.2</sub> /70:30; T <sub>1.5</sub> /50:50; T <sub>3</sub> /10:90; T <sub>4</sub> /10:90; T <sub>4.7</sub> /70:30; T <sub>6</sub> /70:30 |

### S-2: Optimized Parameters for Peptide Mapping

|                   |                                     |                                                                                                                                                                            |
|-------------------|-------------------------------------|----------------------------------------------------------------------------------------------------------------------------------------------------------------------------|
| Source Parameters | VCap                                | 3000                                                                                                                                                                       |
|                   | Ion Source Type                     | H-ESI                                                                                                                                                                      |
|                   | Sheath Gas                          | 50                                                                                                                                                                         |
|                   | Aux Gas                             | 12                                                                                                                                                                         |
|                   | Sweep Gas                           | 1                                                                                                                                                                          |
|                   | Ion Transfer Tube Temp              | 310°C                                                                                                                                                                      |
|                   | Vaporizer Temp                      | 340°C                                                                                                                                                                      |
|                   | Default Charge State                | 2                                                                                                                                                                          |
| Method Parameters | Diverter Setting                    | 0-4: Waste; 4-62: MS; 62-65: Waste                                                                                                                                         |
|                   | Acquisition Range                   | 200-3000m/z                                                                                                                                                                |
|                   | Orbitrap Resolution                 | 120000                                                                                                                                                                     |
|                   | AGC Target                          | 4X10 <sup>5</sup>                                                                                                                                                          |
| DDA Parameters    | Micro-Scans                         | 5                                                                                                                                                                          |
|                   | Charge state                        | 2-8                                                                                                                                                                        |
|                   | Isolation                           | Ion Trap (isolation width 2m/z)                                                                                                                                            |
|                   | CID Assisted Collision Energies (%) | 20,25,30                                                                                                                                                                   |
|                   | MS/MS range                         | 50-1500                                                                                                                                                                    |
| LC-Parameters     | Orbitrap Resolution                 | 6000                                                                                                                                                                       |
|                   | Column                              | BioZen XB C18 (150 X 4.6mm, 2.6µm)                                                                                                                                         |
|                   | Mobile Phase                        | (A) Water: 0.1%(%v/v) Formic acid, (B) ACN: 0.1%(%v/v) Formic acid                                                                                                         |
|                   | Flow Rate                           | 400µl/min                                                                                                                                                                  |
|                   | Injection Volume                    | 5µL                                                                                                                                                                        |
| LC-Parameters     | Gradient Program                    | Tmin/A:B- T <sub>0</sub> /95:5; T <sub>4.0</sub> /95:5; T <sub>10</sub> /90:10; T <sub>50</sub> /5:95; T <sub>55</sub> /5:95; T <sub>60</sub> /95:5; T <sub>65</sub> /95:5 |

S-3: Instrumental Parameters employed for HDX-MS setup

|                          |                        |                                                                                                                                                                       |
|--------------------------|------------------------|-----------------------------------------------------------------------------------------------------------------------------------------------------------------------|
| <b>Source Parameters</b> | VCap                   | 3800                                                                                                                                                                  |
|                          | Ion Source Type        | H-ESI                                                                                                                                                                 |
|                          | Sheath Gas             | 40                                                                                                                                                                    |
|                          | Aux Gas                | 10                                                                                                                                                                    |
|                          | Sweep Gas              | 2                                                                                                                                                                     |
|                          | Ion Transfer Tube Temp | 320°C                                                                                                                                                                 |
|                          | Vaporizer Temp         | 310°C                                                                                                                                                                 |
|                          | Default Charge State   | 6                                                                                                                                                                     |
|                          | Diverter Setting       | 0-1.5- Waste; 1.5-5.8-MS; 5.8-6.0-Waste                                                                                                                               |
| <b>Method Parameters</b> | Acquisition Range      | 500-4000m/z                                                                                                                                                           |
|                          | Orbitrap Resolution    | 120000                                                                                                                                                                |
|                          | AGC Target             | 4X10 <sup>5</sup>                                                                                                                                                     |
| <b>LC-Parameters</b>     | Column                 | BioZen XB C18 (150 X 4.6mm, 2.6µm)                                                                                                                                    |
|                          | Mobile Phase           | (A) D <sub>2</sub> O: 0.1%(%v/v) Formic acid, (B) ACN: 0.1%(%v/v) Formic acid                                                                                         |
|                          | Flow Rate              | 400µl/min                                                                                                                                                             |
|                          | Gradient Program       | T <sub>min</sub> /A:B- T <sub>0,2</sub> /70:30; T <sub>1,5</sub> /50:50; T <sub>3</sub> /10:90; T <sub>4</sub> /10:90; T <sub>4,7</sub> /70:30; T <sub>6</sub> /70:30 |
|                          | Injection Volume       | 5µL                                                                                                                                                                   |

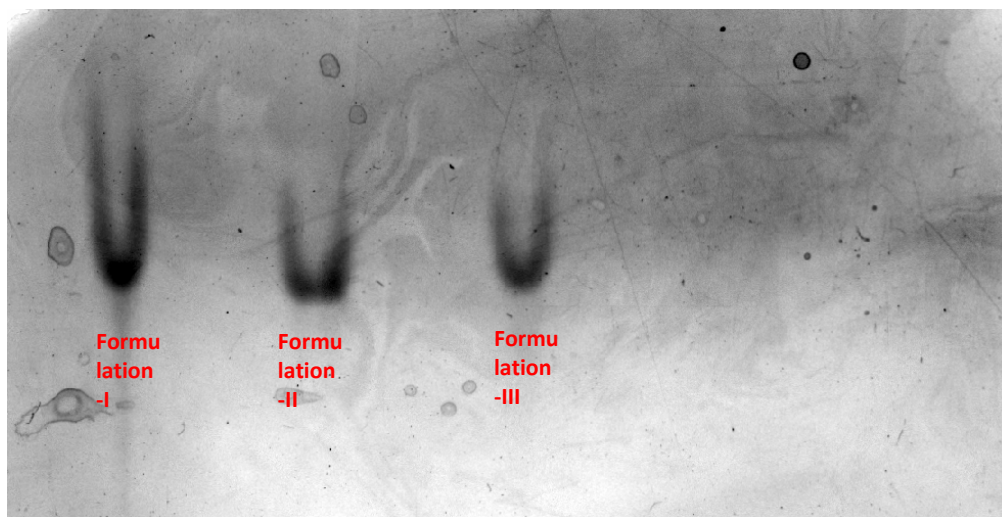

S-4: Native PAGE for three formulations

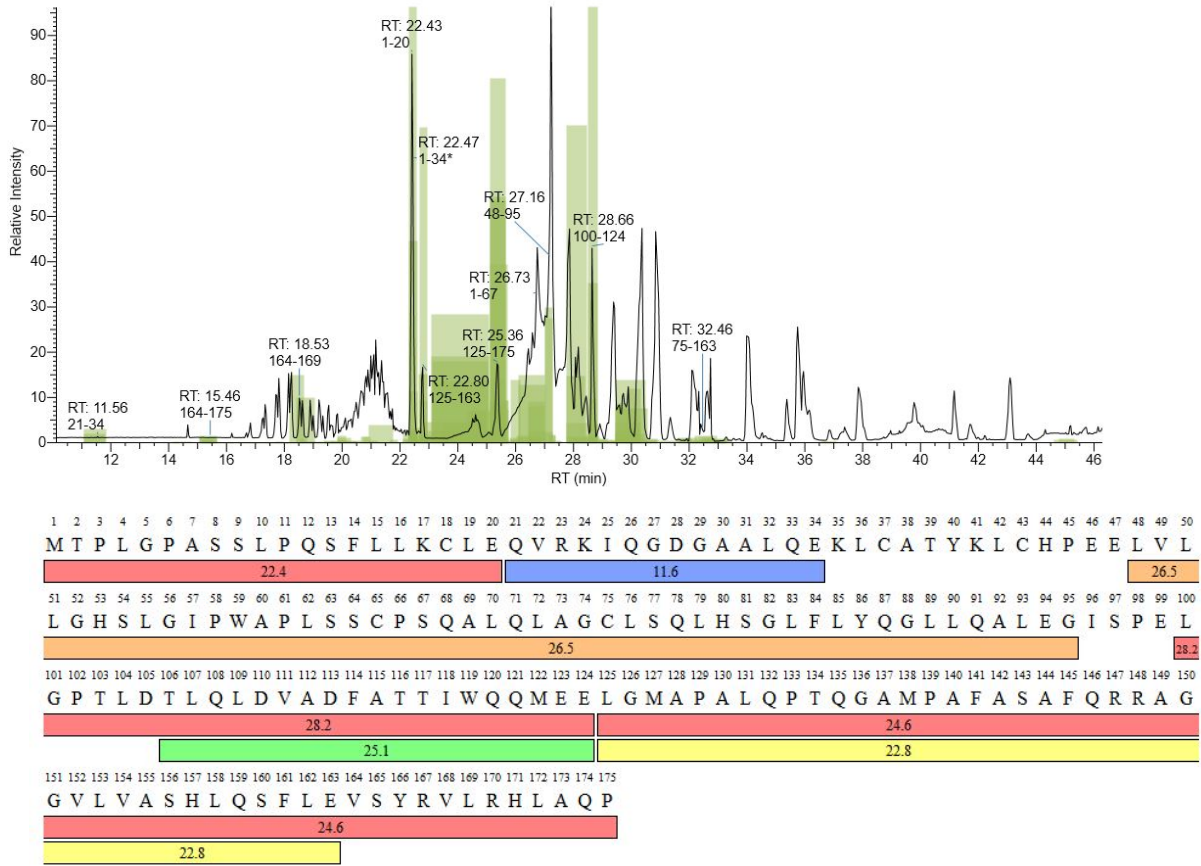

S-5: Base Peak Chromatogram (BPC) showing elution pattern of peptides from digested Formulation along with Peptide Mapping showing coverage

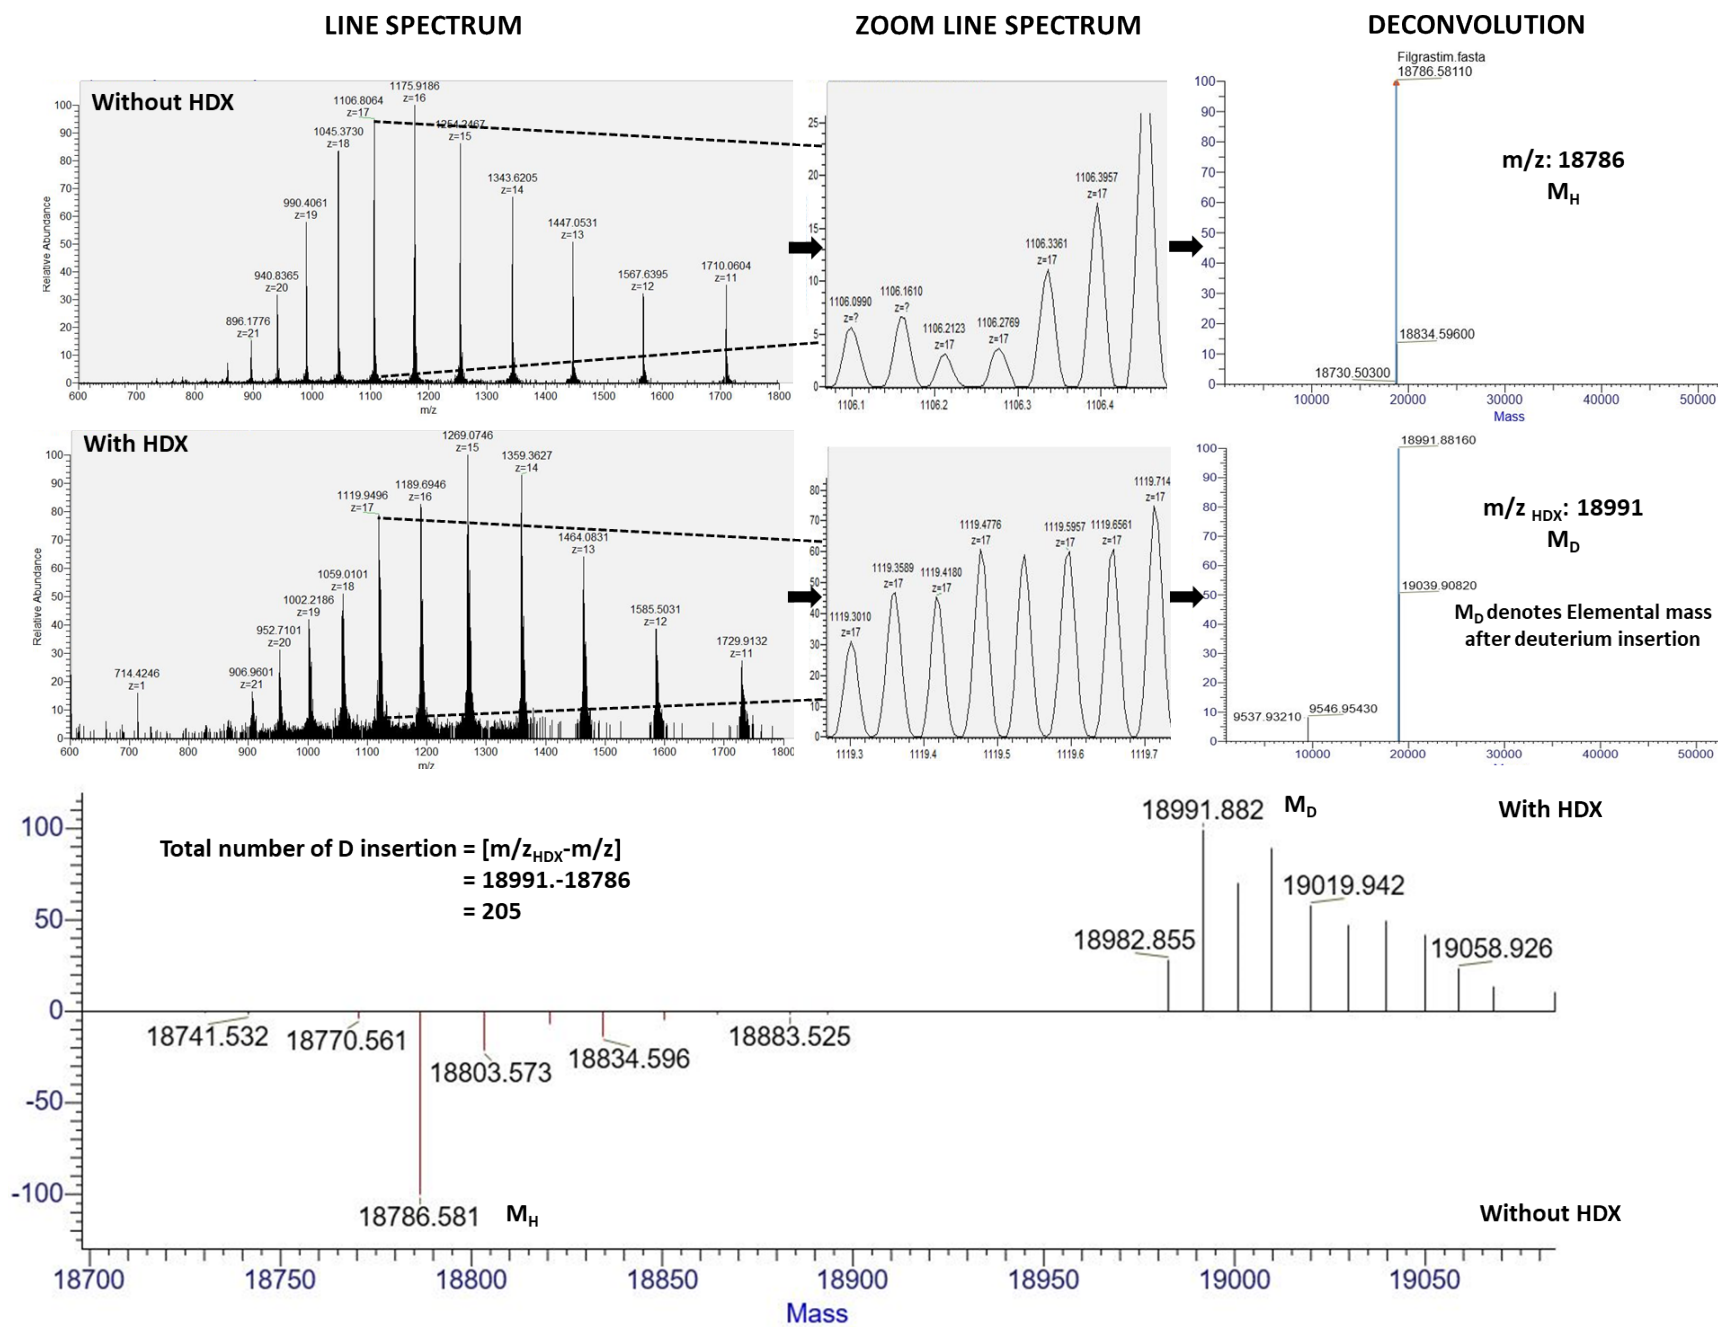

S-6: Representative Line spectrum (a) Deconvolution of both samples with and without HDX and (b) Mirror plot of the obtained deconvoluted spectrum.



S-8 Continue....

|    |        |      |      |       |     |      |      |     |     |    |   |      |      |   |   |   |   |   |   |   |   |   |   |   |   |
|----|--------|------|------|-------|-----|------|------|-----|-----|----|---|------|------|---|---|---|---|---|---|---|---|---|---|---|---|
| 9  | III-9  | 87.5 | 15.3 | 5.94  | 8.0 | 4.09 | 4.00 | 204 | 209 | 83 | 8 | 0.71 | 0.23 | 0 | 1 | 0 | 0 | 1 | 1 | 1 | 1 | 1 | 1 | 1 | 0 |
| 10 | III-10 | 86.3 | 14.5 | 5.92  | 8.0 | 4.07 | 3.95 | 203 | 194 | 83 | 8 | 0.71 | 0.23 | 0 | 1 | 0 | 0 | 1 | 1 | 1 | 1 | 1 | 1 | 1 | 0 |
| 11 | III-11 | 84.9 | 14.6 | 5.51  | 8.0 | 4.06 | 3.88 | 203 | 204 | 83 | 8 | 0.71 | 0.23 | 0 | 1 | 0 | 0 | 1 | 1 | 1 | 1 | 1 | 1 | 1 | 0 |
| 12 | III-12 | 84.1 | 15.0 | 7.41  | 8.0 | 4.05 | 3.97 | 206 | 193 | 83 | 8 | 0.71 | 0.23 | 0 | 1 | 0 | 0 | 1 | 1 | 1 | 1 | 1 | 1 | 1 | 0 |
| 13 | III-13 | 84.3 | 14.6 | 4.75  | 8.0 | 4.08 | 3.92 | 208 | 195 | 83 | 8 | 0.71 | 0.23 | 0 | 1 | 0 | 0 | 1 | 1 | 1 | 1 | 1 | 1 | 1 | 0 |
| 14 | III-14 | 83.9 | 13.9 | 2.46  | 8.0 | 4.12 | 3.91 | 207 | 197 | 83 | 8 | 0.71 | 0.23 | 0 | 1 | 0 | 0 | 1 | 1 | 1 | 1 | 1 | 1 | 1 | 0 |
| 15 | III-15 | 84.8 | 12.9 | 6.97  | 8.0 | 4.10 | 4.00 | 206 | 202 | 83 | 8 | 0.71 | 0.23 | 0 | 1 | 0 | 0 | 1 | 1 | 1 | 1 | 1 | 1 | 1 | 0 |
| 16 | III-16 | 85.3 | 14.2 | 5.36  | 8.0 | 4.07 | 3.92 | 203 | 204 | 83 | 8 | 0.71 | 0.23 | 0 | 1 | 0 | 0 | 1 | 1 | 1 | 1 | 1 | 1 | 1 | 0 |
| 17 | III-17 | 84.5 | 15.7 | 7.64  | 8.0 | 4.07 | 3.87 | 207 | 199 | 83 | 8 | 0.71 | 0.23 | 0 | 1 | 0 | 0 | 1 | 1 | 1 | 1 | 1 | 1 | 1 | 0 |
| 18 | III-18 | 86.1 | 17.2 | 5.48  | 8.0 | 4.08 | 3.92 | 202 | 197 | 83 | 8 | 0.71 | 0.23 | 0 | 1 | 0 | 0 | 1 | 1 | 1 | 1 | 1 | 1 | 1 | 0 |
| 19 | III-19 | 84.3 | 13.8 | 6.26  | 8.0 | 4.08 | 3.89 | 209 | 193 | 83 | 8 | 0.71 | 0.23 | 0 | 1 | 0 | 0 | 1 | 1 | 1 | 1 | 1 | 1 | 1 | 0 |
| 20 | III-20 | 84.8 | 15.6 | 7.28  | 8.0 | 4.07 | 3.91 | 205 | 194 | 83 | 8 | 0.71 | 0.23 | 0 | 1 | 0 | 0 | 1 | 1 | 1 | 1 | 1 | 1 | 1 | 0 |
| 21 | III-21 | 85.9 | 14.0 | 6.31  | 8.0 | 4.09 | 3.91 | 205 | 199 | 83 | 8 | 0.71 | 0.23 | 0 | 1 | 0 | 0 | 1 | 1 | 1 | 1 | 1 | 1 | 1 | 0 |
| 22 | III-22 | 85.6 | 14.7 | 6.61  | 8.0 | 4.10 | 3.89 | 204 | 198 | 83 | 8 | 0.71 | 0.23 | 0 | 1 | 0 | 0 | 1 | 1 | 1 | 1 | 1 | 1 | 1 | 0 |
| 23 | III-23 | 84.5 | 14.2 | 6.00  | 8.0 | 4.10 | 3.87 | 210 | 195 | 83 | 8 | 0.71 | 0.23 | 0 | 1 | 0 | 0 | 1 | 1 | 1 | 1 | 1 | 1 | 1 | 0 |
| 24 | III-24 | 85.1 | 13.7 | 5.96  | 8.0 | 4.10 | 3.93 | 201 | 194 | 83 | 8 | 0.71 | 0.23 | 0 | 1 | 0 | 0 | 1 | 1 | 1 | 1 | 1 | 1 | 1 | 0 |
| 25 | III-25 | 85.5 | 15.5 | 4.69  | 8.0 | 4.09 | 3.88 | 203 | 199 | 83 | 8 | 0.71 | 0.23 | 0 | 1 | 0 | 0 | 1 | 1 | 1 | 1 | 1 | 1 | 1 | 0 |
| 26 | I-26   | 84.4 | 14.5 | 6.79  | 8.0 | 4.10 | 3.86 | 207 | 196 | 83 | 8 | 1.49 | 0.52 | 0 | 0 | 0 | 0 | 1 | 1 | 1 | 1 | 1 | 1 | 1 | 1 |
| 27 | I-27   | 84.5 | 15.0 | 6.85  | 8.0 | 4.14 | 3.74 | 209 | 201 | 83 | 8 | 1.49 | 0.52 | 0 | 0 | 0 | 0 | 1 | 1 | 1 | 1 | 1 | 1 | 1 | 1 |
| 28 | I-28   | 85.1 | 15.1 | 6.83  | 8.0 | 4.06 | 3.84 | 209 | 193 | 83 | 8 | 1.49 | 0.52 | 0 | 0 | 0 | 0 | 1 | 1 | 1 | 1 | 1 | 1 | 1 | 1 |
| 29 | I-29   | 84.9 | 15.6 | 6.37  | 8.0 | 4.08 | 3.95 | 207 | 202 | 83 | 8 | 1.49 | 0.52 | 0 | 0 | 0 | 0 | 1 | 1 | 1 | 1 | 1 | 1 | 1 | 1 |
| 30 | I-30   | 84.8 | 15.2 | 6.38  | 8.0 | 4.12 | 3.83 | 209 | 203 | 83 | 8 | 1.49 | 0.52 | 0 | 0 | 0 | 0 | 1 | 1 | 1 | 1 | 1 | 1 | 1 | 1 |
| 31 | I-31   | 84.8 | 15.1 | 6.47  | 8.0 | 4.06 | 3.86 | 208 | 196 | 83 | 8 | 1.49 | 0.52 | 0 | 0 | 0 | 0 | 1 | 1 | 1 | 1 | 1 | 1 | 1 | 1 |
| 32 | I-32   | 84.9 | 15.0 | 6.54  | 8.0 | 4.15 | 3.89 | 208 | 197 | 83 | 8 | 1.49 | 0.52 | 0 | 0 | 0 | 0 | 1 | 1 | 1 | 1 | 1 | 1 | 1 | 1 |
| 33 | I-33   | 85.1 | 15.3 | 6.35  | 8.0 | 4.13 | 3.92 | 209 | 196 | 83 | 8 | 1.49 | 0.52 | 0 | 0 | 0 | 0 | 1 | 1 | 1 | 1 | 1 | 1 | 1 | 1 |
| 34 | I-34   | 84.3 | 15.1 | 6.36  | 8.0 | 4.10 | 3.86 | 206 | 199 | 83 | 8 | 1.49 | 0.52 | 0 | 0 | 0 | 0 | 1 | 1 | 1 | 1 | 1 | 1 | 1 | 1 |
| 35 | I-35   | 84.9 | 14.7 | 6.84  | 8.0 | 4.09 | 3.81 | 207 | 202 | 83 | 8 | 1.49 | 0.52 | 0 | 0 | 0 | 0 | 1 | 1 | 1 | 1 | 1 | 1 | 1 | 1 |
| 36 | I-36   | 84.8 | 15.4 | 6.95  | 8.0 | 4.11 | 3.89 | 210 | 201 | 83 | 8 | 1.49 | 0.52 | 0 | 0 | 0 | 0 | 1 | 1 | 1 | 1 | 1 | 1 | 1 | 1 |
| 37 | I-37   | 85.5 | 15.0 | 6.33  | 8.0 | 4.22 | 3.97 | 211 | 197 | 83 | 8 | 1.49 | 0.52 | 0 | 0 | 0 | 0 | 1 | 1 | 1 | 1 | 1 | 1 | 1 | 1 |
| 38 | I-38   | 84.3 | 15.3 | 6.88  | 8.0 | 4.14 | 3.93 | 208 | 201 | 83 | 8 | 1.49 | 0.52 | 0 | 0 | 0 | 0 | 1 | 1 | 1 | 1 | 1 | 1 | 1 | 1 |
| 39 | I-39   | 85.3 | 15.9 | 6.79  | 8.0 | 4.16 | 3.87 | 208 | 202 | 83 | 8 | 1.49 | 0.52 | 0 | 0 | 0 | 0 | 1 | 1 | 1 | 1 | 1 | 1 | 1 | 1 |
| 40 | I-40   | 84.6 | 15.1 | 6.81  | 8.0 | 4.10 | 3.90 | 208 | 205 | 83 | 8 | 1.49 | 0.52 | 0 | 0 | 0 | 0 | 1 | 1 | 1 | 1 | 1 | 1 | 1 | 1 |
| 41 | I-41   | 85.5 | 15.3 | 6.31  | 8.0 | 4.07 | 3.87 | 207 | 200 | 83 | 8 | 1.49 | 0.52 | 0 | 0 | 0 | 0 | 1 | 1 | 1 | 1 | 1 | 1 | 1 | 1 |
| 42 | I-42   | 84.6 | 14.8 | 6.48  | 8.0 | 4.15 | 3.80 | 208 | 204 | 83 | 8 | 1.49 | 0.52 | 0 | 0 | 0 | 0 | 1 | 1 | 1 | 1 | 1 | 1 | 1 | 1 |
| 43 | I-43   | 85.1 | 15.0 | 6.38  | 8.0 | 4.22 | 3.85 | 207 | 203 | 83 | 8 | 1.49 | 0.52 | 0 | 0 | 0 | 0 | 1 | 1 | 1 | 1 | 1 | 1 | 1 | 1 |
| 44 | I-44   | 84.5 | 15.0 | 6.77  | 8.0 | 4.12 | 3.89 | 206 | 206 | 83 | 8 | 1.49 | 0.52 | 0 | 0 | 0 | 0 | 1 | 1 | 1 | 1 | 1 | 1 | 1 | 1 |
| 45 | I-45   | 84.5 | 14.9 | 6.51  | 8.0 | 4.12 | 3.85 | 208 | 204 | 83 | 8 | 1.49 | 0.52 | 0 | 0 | 0 | 0 | 1 | 1 | 1 | 1 | 1 | 1 | 1 | 1 |
| 46 | I-46   | 85.8 | 15.6 | 6.53  | 8.0 | 4.12 | 4.00 | 206 | 197 | 83 | 8 | 1.49 | 0.52 | 0 | 0 | 0 | 0 | 1 | 1 | 1 | 1 | 1 | 1 | 1 | 1 |
| 47 | I-47   | 84.3 | 14.5 | 6.81  | 8.0 | 4.10 | 3.96 | 210 | 199 | 83 | 8 | 1.49 | 0.52 | 0 | 0 | 0 | 0 | 1 | 1 | 1 | 1 | 1 | 1 | 1 | 1 |
| 48 | I-48   | 85.2 | 15.6 | 6.62  | 8.0 | 4.12 | 3.86 | 208 | 199 | 83 | 8 | 1.49 | 0.52 | 0 | 0 | 0 | 0 | 1 | 1 | 1 | 1 | 1 | 1 | 1 | 1 |
| 49 | I-49   | 85.1 | 15.3 | 6.69  | 8.0 | 4.09 | 3.94 | 205 | 199 | 83 | 8 | 1.49 | 0.52 | 0 | 0 | 0 | 0 | 1 | 1 | 1 | 1 | 1 | 1 | 1 | 1 |
| 50 | I-50   | 84.8 | 15.2 | 6.57  | 8.0 | 4.11 | 3.93 | 208 | 204 | 83 | 8 | 1.49 | 0.52 | 0 | 0 | 0 | 0 | 1 | 1 | 1 | 1 | 1 | 1 | 1 | 1 |
| 51 | II-51  | 82.0 | 19.4 | 12.66 | 3.0 | 4.03 | 3.98 | 203 | 206 | 90 | 7 | 1.36 | 3.77 | 0 | 0 | 1 | 0 | 1 | 1 | 1 | 1 | 1 | 1 | 0 | 0 |
| 52 | II-52  | 82.1 | 17.5 | 15.57 | 3.0 | 4.04 | 3.98 | 210 | 206 | 90 | 7 | 1.36 | 3.77 | 0 | 0 | 1 | 0 | 1 | 1 | 1 | 1 | 1 | 1 | 0 | 0 |

|    |       |      |      |       |     |      |      |     |     |    |   |      |      |   |   |   |   |   |   |   |   |   |   |   |   |
|----|-------|------|------|-------|-----|------|------|-----|-----|----|---|------|------|---|---|---|---|---|---|---|---|---|---|---|---|
| 53 | II-53 | 81.0 | 18.5 | 14.55 | 3.0 | 4.04 | 3.98 | 206 | 206 | 90 | 7 | 1.36 | 3.77 | 0 | 0 | 1 | 0 | 1 | 1 | 1 | 1 | 1 | 1 | 0 | 0 |
| 54 | II-54 | 82.4 | 18.0 | 12.81 | 3.0 | 4.05 | 3.98 | 207 | 206 | 90 | 7 | 1.36 | 3.77 | 0 | 0 | 1 | 0 | 1 | 1 | 1 | 1 | 1 | 1 | 0 | 0 |
| 55 | II-55 | 80.8 | 17.3 | 13.32 | 3.0 | 4.03 | 3.99 | 210 | 206 | 90 | 7 | 1.36 | 3.77 | 0 | 0 | 1 | 0 | 1 | 1 | 1 | 1 | 1 | 1 | 0 | 0 |
| 56 | II-56 | 81.0 | 18.4 | 12.63 | 3.0 | 4.04 | 3.98 | 209 | 206 | 90 | 7 | 1.36 | 3.77 | 0 | 0 | 1 | 0 | 1 | 1 | 1 | 1 | 1 | 1 | 0 | 0 |
| 57 | II-57 | 81.8 | 17.8 | 15.23 | 3.0 | 4.04 | 3.99 | 206 | 206 | 90 | 7 | 1.36 | 3.77 | 0 | 0 | 1 | 0 | 1 | 1 | 1 | 1 | 1 | 1 | 0 | 0 |
| 58 | II-58 | 81.6 | 17.7 | 15.30 | 3.0 | 4.03 | 3.98 | 208 | 206 | 90 | 7 | 1.36 | 3.77 | 0 | 0 | 1 | 0 | 1 | 1 | 1 | 1 | 1 | 1 | 0 | 0 |
| 59 | II-59 | 82.4 | 17.9 | 14.91 | 3.0 | 4.04 | 3.98 | 207 | 206 | 90 | 7 | 1.36 | 3.77 | 0 | 0 | 1 | 0 | 1 | 1 | 1 | 1 | 1 | 1 | 0 | 0 |
| 60 | II-60 | 81.5 | 18.1 | 15.20 | 3.0 | 4.04 | 3.98 | 212 | 206 | 90 | 7 | 1.36 | 3.77 | 0 | 0 | 1 | 0 | 1 | 1 | 1 | 1 | 1 | 1 | 0 | 0 |
| 61 | II-61 | 80.5 | 19.2 | 13.16 | 3.0 | 4.04 | 3.97 | 204 | 206 | 90 | 7 | 1.36 | 3.77 | 0 | 0 | 1 | 0 | 1 | 1 | 1 | 1 | 1 | 1 | 0 | 0 |
| 62 | II-62 | 81.4 | 18.6 | 14.45 | 3.0 | 4.04 | 3.98 | 208 | 206 | 90 | 7 | 1.36 | 3.77 | 0 | 0 | 1 | 0 | 1 | 1 | 1 | 1 | 1 | 1 | 0 | 0 |
| 63 | II-63 | 82.9 | 18.7 | 13.97 | 3.0 | 4.05 | 3.98 | 206 | 206 | 90 | 7 | 1.36 | 3.77 | 0 | 0 | 1 | 0 | 1 | 1 | 1 | 1 | 1 | 1 | 0 | 0 |
| 64 | II-64 | 81.7 | 17.5 | 16.00 | 3.0 | 4.03 | 3.99 | 212 | 206 | 90 | 7 | 1.36 | 3.77 | 0 | 0 | 1 | 0 | 1 | 1 | 1 | 1 | 1 | 1 | 0 | 0 |
| 65 | II-65 | 82.4 | 18.5 | 14.89 | 3.0 | 4.04 | 3.99 | 211 | 206 | 90 | 7 | 1.36 | 3.77 | 0 | 0 | 1 | 0 | 1 | 1 | 1 | 1 | 1 | 1 | 0 | 0 |
| 66 | II-66 | 82.2 | 18.6 | 15.91 | 3.0 | 4.04 | 3.98 | 209 | 206 | 90 | 7 | 1.36 | 3.77 | 0 | 0 | 1 | 0 | 1 | 1 | 1 | 1 | 1 | 1 | 0 | 0 |
| 67 | II-67 | 81.2 | 18.4 | 14.84 | 3.0 | 4.03 | 3.98 | 210 | 206 | 90 | 7 | 1.36 | 3.77 | 0 | 0 | 1 | 0 | 1 | 1 | 1 | 1 | 1 | 1 | 0 | 0 |
| 68 | II-68 | 82.0 | 19.4 | 13.67 | 3.0 | 4.04 | 3.98 | 208 | 206 | 90 | 7 | 1.36 | 3.77 | 0 | 0 | 1 | 0 | 1 | 1 | 1 | 1 | 1 | 1 | 0 | 0 |
| 69 | II-69 | 82.1 | 16.8 | 16.19 | 3.0 | 4.04 | 3.98 | 209 | 206 | 90 | 7 | 1.36 | 3.77 | 0 | 0 | 1 | 0 | 1 | 1 | 1 | 1 | 1 | 1 | 0 | 0 |
| 70 | II-70 | 82.3 | 18.9 | 13.14 | 3.0 | 4.05 | 3.99 | 207 | 206 | 90 | 7 | 1.36 | 3.77 | 0 | 0 | 1 | 0 | 1 | 1 | 1 | 1 | 1 | 1 | 0 | 0 |
| 71 | II-71 | 82.9 | 19.4 | 13.69 | 3.0 | 4.05 | 3.99 | 208 | 206 | 90 | 7 | 1.36 | 3.77 | 0 | 0 | 1 | 0 | 1 | 1 | 1 | 1 | 1 | 1 | 0 | 0 |
| 72 | II-72 | 81.9 | 19.1 | 13.81 | 3.0 | 4.03 | 4.00 | 208 | 206 | 90 | 7 | 1.36 | 3.77 | 0 | 0 | 1 | 0 | 1 | 1 | 1 | 1 | 1 | 1 | 0 | 0 |
| 73 | II-73 | 80.4 | 18.6 | 13.21 | 3.0 | 4.05 | 3.98 | 211 | 206 | 90 | 7 | 1.36 | 3.77 | 0 | 0 | 1 | 0 | 1 | 1 | 1 | 1 | 1 | 1 | 0 | 0 |
| 74 | II-74 | 82.0 | 16.7 | 15.31 | 3.0 | 4.03 | 3.98 | 209 | 206 | 90 | 7 | 1.36 | 3.77 | 0 | 0 | 1 | 0 | 1 | 1 | 1 | 1 | 1 | 1 | 0 | 0 |
| 75 | II-75 | 82.3 | 18.1 | 15.50 | 3.0 | 4.05 | 3.98 | 212 | 206 | 90 | 7 | 1.36 | 3.77 | 0 | 0 | 1 | 0 | 1 | 1 | 1 | 1 | 1 | 1 | 0 | 0 |

**Note:** \* Have been excluded from PCA analysis as no discrimination was there between the formulations.

**Description for the input:**

A: Unique ID are created for easy identification where first letter stands for formulation followed by numerical number to separate 25 replicates of each formulation;

B: Relative intensity of major isoform-I based on Intact Mass Analysis;

C: Relative intensity of major isoform-II based on Intact Mass Analysis;

D: Relative ratio of oxidized protein in formulation

E: Number of charged species from Iso-Electric Focusing;

F: Log of relative H-D exchange contribution for major isoform-I from data of HDX-MS;

G: Log of relative H-D exchange contribution for major isoform-II from data of HDX-MS;

H: Difference in deconvoluted molecular mass of major isoform-I post H-D Exchange;

I: Difference in deconvoluted molecular mass of major isoform-II post H-D Exchange;

J: Sequence Coverage Score from peptide mapping;

K: No. of Peptides detected in the formulation from peptide mapping data;

L: PTM based ratio of oxidized peptide vs un-oxidized peptide for M122 from data of peptide mapping analysis;

M: PTM based ratio of oxidized peptide vs un-oxidized peptide for M138 from data of peptide mapping analysis;

N-Y: Presence/Absence of peptides from peptide mapping data.

S-9:X/Y Contribution Plots Displaying individual parameters contribution in PCA analysis. Cumulative Contribution Plot A); Contribution in PCA 1 component analysis B); and Contribution in PCA 2 component analysis C).

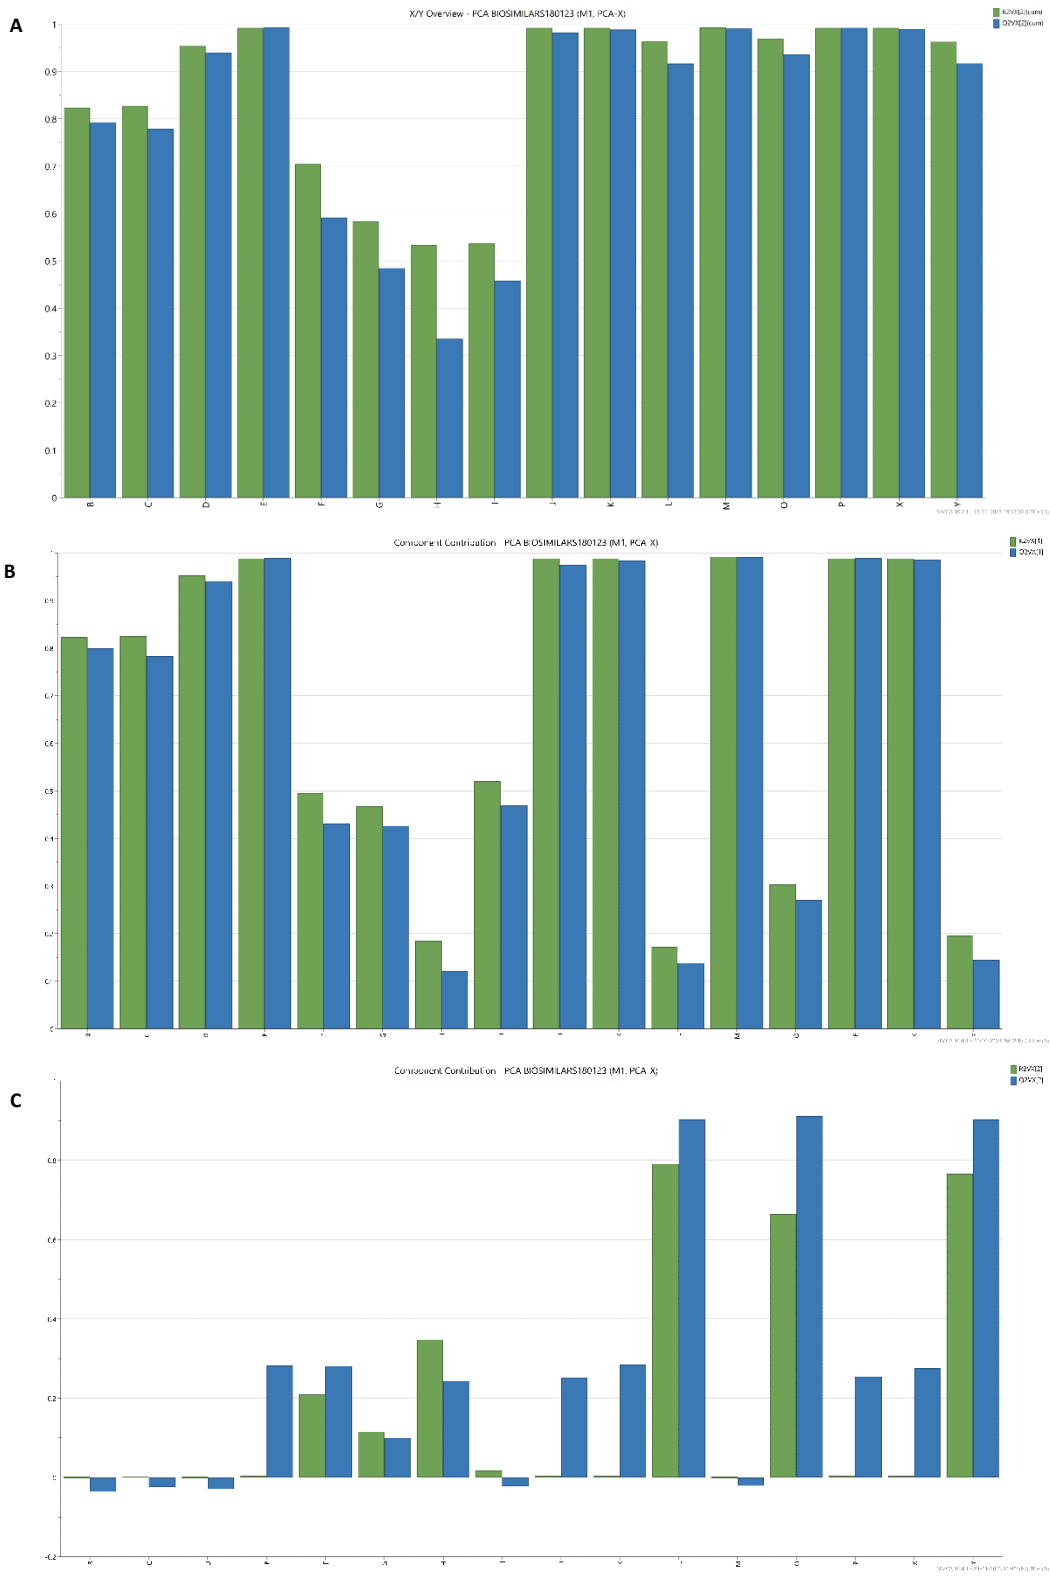

**Note:** X axis represents different input Parameters used in the study where Y axis represents its contribution in PCA. R2 tells us how much of variability of a variable that is fitted by the model (as fraction) shown as Green colour bar; and Q2 tells us how much variability of a variable that is predicted by model (as fraction).

In PCA analysis, XY contribution displays how much a model was able to fit a particular variable. As shown in Fig 4, the two component PCA analysis shows different clusters for three formulations, wherein the differentiation observed is a result of the parameter whose contribution is least in



XY contribution plot. It is clear from the plot that HDX-MS variables F-I have the least contribution, therefore this technique can serve as most discriminative one.

**Description for input:**

- B: Relative intensity of major isoform-I based on Intact Mass Analysis;
- C: Relative intensity of major isoform-II based on Intact Mass Analysis;
- D: Relative ratio of oxidized protein in formulation
- E: Number of charged species from Iso-Electric Focusing;
- F: Log of relative H-D exchange contribution for major isoform-I from data of HDX-MS;
- G: Log of relative H-D exchange contribution for major isoform-II from data of HDX-MS;
- H: Difference in deconvoluted molecular mass of major isoform-I post H-D Exchange;
- I: Difference in deconvoluted molecular mass of major isoform-II post H-D Exchange;
- J: Sequence Coverage Score from peptide mapping;
- K: No. of Peptides detected in the formulation from peptide mapping data;
- L: PTM based ratio of oxidized peptide vs un-oxidized peptide for M122 from data of peptide mapping analysis;
- M: PTM based ratio of oxidized peptide vs un-oxidized peptide for M138 from data of peptide mapping analysis;
- O: Presence/Absence of peptide no.2 from peptide mapping data.
- P: Presence/Absence of peptide no.3 from peptide mapping data.
- X: Presence/Absence of peptide no.11 from peptide mapping data.
- Y: Presence/Absence of peptide no.12 from peptide mapping data.

### S-10: Line Spectra for IMA of Formulations

Formulation-I

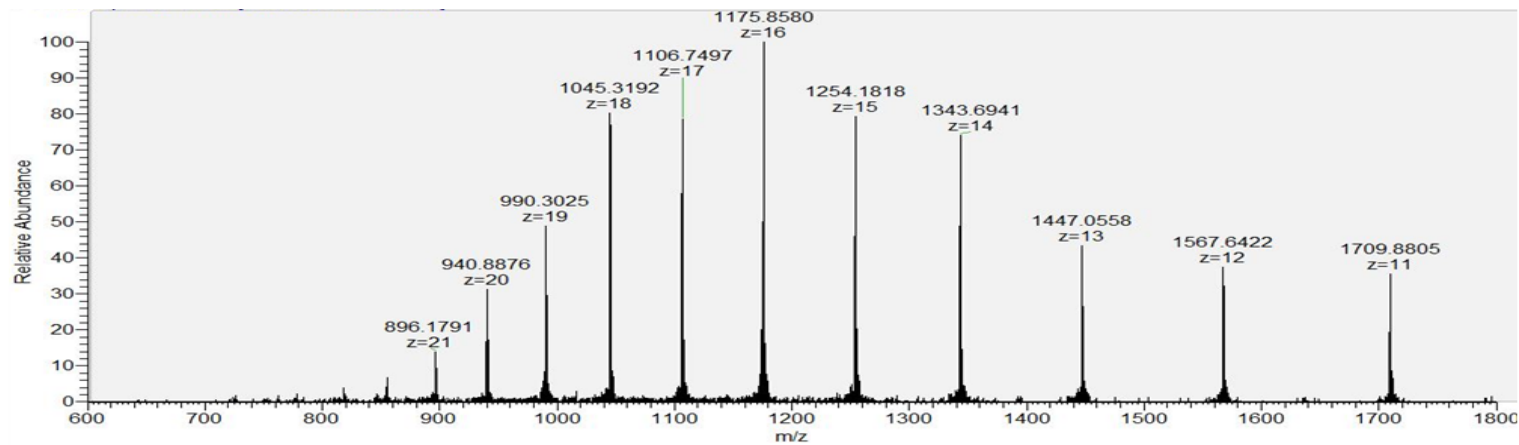

Formulation-II

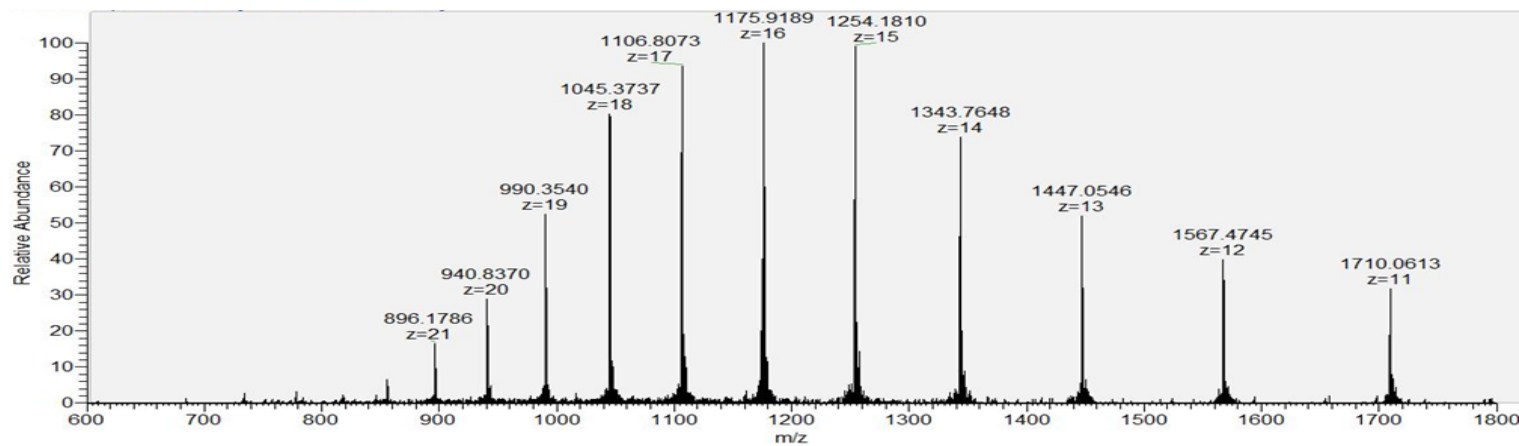

Formulation-III

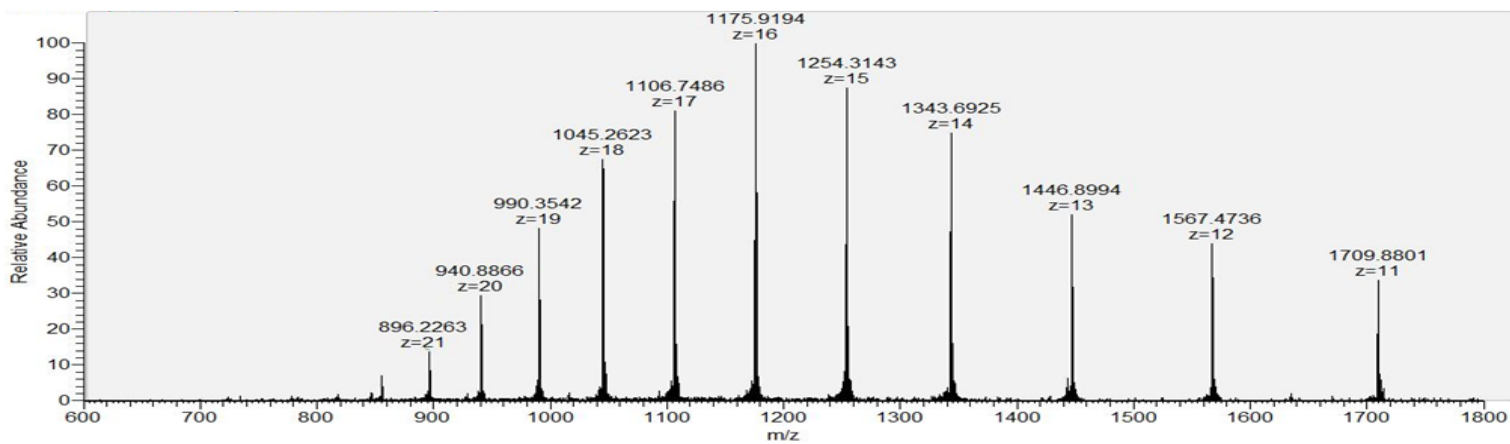

Supplement: d2ay01788a1.pdf [file d2ay01788a1.pdf]
